# Supplementary material for: SXT/R391 integrative and conjugative elements in Proteus species reveal abundant genetic diversity and multidrug resistance
Source: PubMed Central journal article supplement (PMC5124997; doi:10.1038/srep37372), 2016-11-28
Supplement: srep37372-s1.pdf [file srep37372-s1.pdf]

1 **Supplementary Information:**

2 **SXT/R391 integrative and conjugative elements in *Proteus* species reveal**  
 3 **abundant genetic diversity and multidrug resistance.**

4 Xinyue Li<sup>1,2</sup>, Yu Du<sup>1,2</sup>, Pengcheng Du<sup>3</sup>, Hang Dai<sup>1,2</sup>, Yujie Fang<sup>1,2</sup>, Zhenpeng Li<sup>1,2</sup>,  
 5 Na Lv<sup>4</sup>, Baoli Zhu<sup>4</sup>, Biao Kan<sup>1,2</sup>, Duochun Wang<sup>1,2\*</sup>

6

7 Supplementary Table S1. Twenty-four ICEs representative for the different  
 8 evolutionary origins and species.

| Strain name                                                   | ICEs name      | Isolation place         | Isolation source | Isolation year | Accession number |
|---------------------------------------------------------------|----------------|-------------------------|------------------|----------------|------------------|
| <i>Alteromonas macleodii</i> str. Aegean Sea MED64#           | -              | Aegean Sea of Lebanon   | water            | 2000           | CP004848.1       |
| <i>Alteromonas macleodii</i> str. 'Ionian Sea UM7             | -              | Ionian Sea              | water            | -              | CP004853.1       |
| <i>Photobacterium damsela</i> subsp. <i>Piscicida</i> PC554.2 | ICEPdaSpa1     | Galicia, Spain          | fish             | -              | AJ870986.2       |
| <i>Proteus mirabilis</i> PM14C28                              | ICEPmiJpn1     | Heibei, China           | Chicken          | 2014           | KT894734.1       |
| <i>Proteus mirabilis</i> PM13C04#                             | ICEPmiChn1#    | Hubei, China            | Chicken          | 2013           | KT962845.1       |
| <i>Proteus mirabilis</i> HI4320                               | ICEPmiUsa1     | USA                     | -                | 1986           | AM942759.1       |
| <i>Providencia alcalifaciens</i> Ban1                         | ICE Pal Ban1   | Bangladesh              | -                | 1999           | GQ463139.1       |
| <i>Providencia rettgeri</i> R391                              | R391           | Pretoria, South Africa  | -                | 1967           | AY090559.1       |
| <i>Providencia stuartii</i> ATCC 33672#                       | -              | -                       | -                | -              | CP008920.1       |
| <i>Shewanella</i> sp. W3-18-1                                 | ICESpuPO1      | Pacific Ocean           | marine sediments | 2000           | CP000503.1       |
| <i>Vibrio alginolyticus</i> A056-1                            | ICEValA056-1   | China                   | gill             | -              | KR231688.1       |
| <i>Vibrio alginolyticus</i> HN396                             | ICEValHN396    | China                   | seawater         | 2008           | KT072770.1       |
| <i>Vibrio alginolyticus</i> HN492                             | ICEValHN492    | China                   | seawater         | 2008           | KT072769.1       |
| <i>Vibrio alginolyticus</i> A056-2                            | ICEValA056-2   | China                   | gill             | 2003           | KR231689.1       |
| <i>Vibrio cholerae</i> MJ-1236#                               | ICEVchBan9#    | Bangladesh              | -                | 1994           | CP001485.1       |
| <i>Vibrio cholerae</i> ICDC-4210 #                            | ICEVchCHN4210# | China                   | Patient          | 1999           | KT151662.1       |
| <i>Vibrio cholerae</i> 2010EL-1786                            | SXT element    | Haitian                 | Patient          | 2010           | CP003069.1       |
| <i>Vibrio cholerae</i> Ban5                                   | ICEVchBan5     | Bangladesh              | -                | 1998           | GQ463140.1       |
| <i>Vibrio cholerae</i> Ind4                                   | ICEVchInd4     | Kolkata, India          | -                | 1997           | GQ463141.1       |
| <i>Vibrio cholerae</i> Mex1                                   | ICEVchMex1     | San Luis Potosi, Mexico | -                | 2001           | GQ463143.1       |
| <i>Vibrio cholerae</i> MO10                                   | SXT            | Chennai, India          | -                | 2002           | AY055428.1       |
| <i>Vibrio parahaemolyticus</i> UCM-V493                       | -              | Spain                   | sediment sample  | 2002           | CP007004.1       |
| <i>Vibrio cholerae</i> ICDC-2605#                             | ICEVchCHN2605# | Guizhou, China          | fecal sample     | 1998           | KT151661         |
| <i>Vibrio fluvialis</i> H-08942                               | ICEVflInd1     | India                   | -                | 2002           | GQ463144         |

9 “#”: indicated the reference ICEs and/or strains used in supplementary Figure S1.

10  
11  
12

Supplementary Table S2. Primer information for amplifying antibiotic resistance genes in ICEs.

| Target gene  | Primer  | Neucleotide Sequence(5'-3') | Amplicon size (bp) | Related antibiotics |
|--------------|---------|-----------------------------|--------------------|---------------------|
| <i>strA</i>  | strA-F  | TTGATGTGGTGTCCCGCAATGC      | 383                | Streptomycin        |
|              | strA-R  | CCAATCGCAGATAGAAGGCAA       |                    |                     |
| <i>strB</i>  | strB-F  | CGAGGCATTGCTCATCATTT        | 443                | Streptomycin        |
|              | strB-R  | TTCTCATTGCGGACACCTTTT       |                    |                     |
| <i>floR</i>  | floR-F  | CGACATCCTCGCTTCACTG         | 625                | Chloramphenicol     |
|              | floR-R  | GACGAAGAAGGTGCCCATAC        |                    |                     |
| <i>sul2</i>  | sul2-F  | TTTTCGGCATCGTCAACATAA       | 549                | Sulfisoxazole       |
|              | sul2-R  | AGAGCGAGGTTTCGGGAGC         |                    |                     |
| <i>tetA</i>  | tetA-F  | TTCCTGACGGGCTGTTTCCTT       | 600                | Tetracycline        |
|              | tetA-R  | TGCAATCCATGCCCACCCGTTCCAC   |                    |                     |
| <i>dfrA1</i> | dfrA1-F | CGAAGAATGGAGTTATCGGG        | 372                | Trimethoprim        |
|              | dfrA1-R | TGCTGGGGATTTCAGGAAAG        |                    |                     |

The primers were designed based on ICEs sequence of *Vibrio cholerae* MO10 (AY055428.1).

13  
14  
15  
16

Supplementary Table S3. The predicted ORFs of the fifteen ICEs in this study.

| ORF | ICEPvuCHN22 | ICEPmiCHN | ICEPmiCHN2407      | ICEPmiCHN          | ICEPmiCHN24        | ICEPmiCHN | ICEPmiCHN90 | ICEPmiCHN90 |
|-----|-------------|-----------|--------------------|--------------------|--------------------|-----------|-------------|-------------|
|     | 13          | 1586      |                    | 2410               | 16                 | 901       | 2           | 3           |
| 1   | HP          | HP        | HP                 | HP                 | HP                 | HP        | HP          | HP          |
| 2   | MutL        | MutL      | HP                 | HP                 | integrase          | HP        | HP          | integrase   |
| 3   | integrase   | integrase | HP                 | HP                 | s002               | integrase | integrase   | s002        |
| 4   | s002        | s002      | integrase          | integrase          | s003               | s002      | s002        | s003        |
| 5   | s003        | s003      | s002               | s002               | HP                 | s003      | s003        | HP          |
| 6   | HP          | HP        | s003               | s003               | HP                 | HP        | HP          | HP          |
| 7   | HP          | HP        | HP                 | HP                 | RumB               | HP        | HP          | HP          |
| 8   | HP          | RumB      | HP                 | HP                 | tnp                | RumB      | HP          | RumB        |
| 9   | RumB        | tnp       | RumB               | RumB               | tnpA               | tnp       | RumB        | tnp         |
| 10  | tnp         | tnpA      | tnp                | tnp                | HP                 | tnpA      | tnp         | tnpA        |
| 11  | tnpA        | tnpB      | tnpA               | tnpA               | HP                 | tnpB      | tnpA        | tnpB        |
| 12  | tnpB        | HP        | HP                 | HP                 | HP                 | DhfR      | tnpB        | DhfR        |
| 13  | DhfR        | DhfR      | HP                 | HP                 | $\beta$ -lactamase | tnpB      | DhfR        | tnpB        |
| 14  | tnpB        | tnpB      | HP                 | HP                 | HP                 | s013      | tnpB        | s013        |
| 15  | s013        | s013      | $\beta$ -lactamase | $\beta$ -lactamase | HP                 | FloR      | s013        | FloR        |
| 16  | FloR        | FloR      | HP                 | HP                 | polymerase III     | s015      | FloR        | s015        |
| 17  | s015        | s015      | HP                 | HP                 | HP                 | tnpB      | s015        | tnpB        |
| 18  | tnpB        | tnpB      | polymerase III     | polymerase III     | s026               | StrB      | tnpB        | StrB        |

|    |                |                |                   |                   |                   |                    |                    |                    |
|----|----------------|----------------|-------------------|-------------------|-------------------|--------------------|--------------------|--------------------|
| 19 | StrB           | StrB           | HP                | HP                | HP                | StrA               | StrB               | StrA               |
| 20 | StrA           | StrA           | s026              | s026              | Type I RM         | Sul2               | StrA               | Sul2               |
| 21 | Sul2           | Sul2           | HP                | HP                | HP                | HP                 | Sul2               | HP                 |
| 22 | tnpA           | tnpA           | Type I RM         | Type I RM         | HP                | $\beta$ -lactamase | HP                 | $\beta$ -lactamase |
| 23 | RumB           | RumB           | HP                | HP                | Type I RM         | HP                 | $\beta$ -lactamase | HP                 |
| 24 | HP             | HP             | HP                | HP                | protein kinase    | RumA               | HP                 | polymerase III     |
| 25 | RumA           | RumA           | Type I RM         | Type I RM         | HP                | polymerase III     | polymerase III     | HP                 |
| 26 | polymerase III | polymerase III | protein kinase    | protein kinase    | helicase          | HP                 | HP                 | s026               |
| 27 | s025           | s025           | HP                | HP                | TraI              | s026               | s026               | Type I RM          |
| 28 | s026           | s026           | helicase          | helicase          | transposase       | Type I RM          | Type I RM          | Type I RM          |
| 29 | Type I RM      | helicase       | TraI              | TraI              | TraD              | Type I RM          | Type I RM          | bstXI              |
| 30 | Type I RM      | Type II RM     | transposase       | HP                | 234               | bstXI              | bstXI              | Type I RM          |
| 31 | bstXI          | helicase       | TraD              | TraD              | s043              | Type I RM          | Type I RM          | ATPase             |
| 32 | Type I RM      | helicase       | 234               | 234               | HP                | HP                 | ATPase             | tnp                |
| 33 | HP             | TraI           | s043              | S043              | Fic               | tnp                | tnp                | HP                 |
| 34 | McrC           | TraD           | HP                | HP                | TraL              | HP                 | HP                 | McrC               |
| 35 | Mrr            | 234            | Fic               | Fic               | TraE              | McrC               | McrC               | Mrr                |
| 36 | HP             | s043           | TraL              | TraL              | TraK              | Mrr                | Mrr                | HP                 |
| 37 | HP             | HP             | TraE              | TraE              | TraB              | HP                 | HP                 | HP                 |
| 38 | TraI           | TraL           | TraK              | TraK              | TraV              | HP                 | HP                 | TraI               |
| 39 | TraD           | TraE           | TraB              | TraB              | TraA              | TraI               | TraI               | TraD               |
| 40 | 234            | TraK           | TraV              | TraV              | acetyltransferase | TraD               | TraD               | 234                |
| 41 | s043           | TraB           | TraA              | TraA              | HP                | 234                | 234                | s043               |
| 42 | tnp            | TraV           | acetyltransferase | acetyltransferase | s054              | s043               | s043               | HP                 |
| 43 | HP             | TraA           | HP                | HP                | TraC              | HP                 | HP                 | TraL               |
| 44 | HP             | Ynd            | s054              | s054              | 345               | TraL               | TraL               | TraE               |
| 45 | tnp            | Ync            | TraC              | TraC              | TrhF              | TraE               | TraE               | TraK               |
| 46 | HP             | s054           | 345               | 345               | TraW              | TraK               | TraK               | TraB               |
| 47 | TraL           | TraC           | TrhF              | TrhF              | TraU              | TraB               | TraB               | TraV               |
| 48 | TraE           | HP             | TraW              | TraW              | TraN              | TraV               | TraV               | TraA               |
| 49 | TraK           | TrhF           | TraU              | TraU              | HP                | TraA               | TraA               | Ynd                |
| 50 | TraB           | TraW           | TraN              | TraN              | helicase          | Ynd                | Ynd                | Ync                |
| 51 | TraV           | TraU           | HP                | HP                | Dns               | Ync                | Ync                | s054               |
| 52 | TraA           | TraN           | helicase          | helicase          | ISPPu12 tnpA      | s054               | s054               | TraC               |
| 53 | Ynd            | HP             | Dns               | Dns               | lspA              | TraC               | TraC               | 345                |
| 54 | Ync            | GTPases        | ISPPu12 tnpA      | lspA              | CzcD              | 345                | 345                | TrhF               |
| 55 | s054           | HP             | lspA              | CzcD              | MerR              | TrhF               | TrhF               | TraW               |
| 56 | TraC           | Dns            | CzcD              | s063              | s063              | TraW               | TraW               | TraU               |
| 57 | HP             | s063           | MerR              | HP                | HP                | TraU               | TraU               | TraN               |
| 58 | TrhF           | HP             | HP                | SSB               | SSB               | TraN               | TraN               | HP                 |

|    |         |              |           |         |         |              |          |              |
|----|---------|--------------|-----------|---------|---------|--------------|----------|--------------|
| 59 | TraW    | SSB          | HP        | Bet     | Bet     | HP           | HP       | helicase     |
| 60 | TraU    | s065         | Resolvase | HP      | HP      | helicase     | helicase | Dns          |
| 61 | TraN    | HP           | HP        | s066    | s066    | Dns          | Dns      | ISPPu12 tnpA |
| 62 | HP      | s066         | HP        | s067    | s067    | ISPPu12 tnpA | HP       | s063         |
| 63 | HP      | s067         | TetA      | HP      | HP      | s063         | SSB      | HP           |
| 64 | s063    | HP           | TetR      | s068    | s068    | HP           | Bet      | SSB          |
| 65 | HP      | s068         | s063      | s069    | s069    | SSB          | HP       | Bet          |
| 66 | SSB     | s069         | HP        | s070    | s070    | Bet          | s066     | HP           |
| 67 | Bet     | s070         | SSB       | s071    | s071    | HP           | s067     | s066         |
| 68 | HP      | s071         | Bet       | HP      | HP      | s066         | HP       | s067         |
| 69 | s066    | HP           | HP        | primase | primase | s067         | s068     | s068         |
| 70 | s067    | primase      | s066      | s073    | s073    | HP           | s069     | s069         |
| 71 | HP      | s073         | s067      | TraF    | TraF    | s068         | s070     | s070         |
| 72 | s068    | HP           | HP        | TraH    | TraH    | s069         | s071     | s071         |
| 73 | s069    | endonuclease | s068      | TraG    | TraG    | s070         | HP       | HP           |
| 74 | s070    | prcA         | s069      | MerR    | MerR    | s071         | primase  | primase      |
| 75 | s071    | TraF         | s070      | MerT    | MerT    | HP           | s073     | s073         |
| 76 | HP      | TraH         | s071      | MerP    | MerP    | primase      | TraF     | TraF         |
| 77 | primase | TraG         | HP        | MerC    | MerC    | s073         | TraH     | TraH         |
| 78 | s073    | EexS         | primase   | MerA    | MerA    | TraF         | TraG     | TraG         |
| 79 | HP      | SetC         | s073      | EexR    | EexR    | TraH         | EexS     | EexS         |
| 80 | HP      | SetD         | TraF      | SetC    | SetC    | TraG         | SetC     | SetC         |
| 81 | HP      | s082         | TraH      | SetD    | SetD    | EexS         | SetD     | SetD         |
| 82 | TraF    | HP           | TraG      | s082    | s082    | SetC         | s082     | s082         |
| 83 | TraH    | s085         | MerR      | HP      | HP      | SetD         | HP       | HP           |
| 84 | TraG    | s086         | MerT      | s085    | s085    | s082         | s085     | s085         |
| 85 | EexS    | SetR         | MerP      | s086    | s086    | HP           | s086     | s086         |
| 86 | SetC    | -            | MerC      | SetR    | SetR    | s085         | SetR     | SetR         |
| 87 | SetD    | -            | MerA      | -       | -       | s086         | -        | -            |
| 88 | s082    | -            | EexR      | -       | -       | SetR         | -        | -            |
| 89 | HP      | -            | SetC      | -       | -       | -            | -        | -            |
| 90 | s085    | -            | SetD      | -       | -       | -            | -        | -            |
| 91 | s086    | -            | s082      | -       | -       | -            | -        | -            |
| 92 | SetR    | -            | HP        | -       | -       | -            | -        | -            |
| 93 | -       | -            | s085      | -       | -       | -            | -        | -            |
| 94 | -       | -            | s086      | -       | -       | -            | -        | -            |
| 95 | -       | -            | SetR      | -       | -       | -            | -        | -            |

| ORF | ICEPmiCHN904 | ICEPmiCHN90 | ICEPmiCHN18 | ICEPmiCHN3237 | ICEPmiCHN3277 | ICEPmiCHN3300 | ICEPmiCHN33 |
|-----|--------------|-------------|-------------|---------------|---------------|---------------|-------------|
| 1   | HP           | HP          | HP          | HP            | SetR          | HP            | HP          |
| 2   | HP           | HP          | HP          | integrase     | s086          | HP            | HP          |
| 3   | integrase    | integrase   | integrase   | s002          | HP            | MutL          | integrase   |
| 4   | s002         | s002        | s002        | s003          | s082          | integrase     | s002        |
| 5   | s003         | s003        | s003        | HP            | SetD          | s002          | s003        |

|    |                    |                    |                    |                    |              |                        |                           |
|----|--------------------|--------------------|--------------------|--------------------|--------------|------------------------|---------------------------|
| 6  | HP                 | HP                 | HP                 | HP                 | SetC         | s003                   | HP                        |
| 7  | HP                 | HP                 | HP                 | RumB               | HP           | HP                     | HP                        |
| 8  | HP                 | HP                 | RumB               | tnp                | TraH         | HP                     | RumB                      |
| 9  | RumB               | RumB               | RumA               | tnpA               | HP           | RumB                   | tnp                       |
| 10 | tnp                | tnp                | IS4,transposase    | tnpB               | endonuclease | tnp                    | tnpA                      |
| 11 | tnpB               | tnpA               | polymerase III     | HP                 | HP           | tnpA                   | tnpB                      |
| 12 | s013               | tnpB               | HP                 | $\beta$ -lactamase | HP           | tnpB                   | s013                      |
| 13 | FloR               | s013               | HP                 | HP                 | HP           | s013                   | FloR                      |
| 14 | s015               | FloR               | HP                 | polymerase III     | s071         | DhfR                   | s015                      |
| 15 | tnpB               | s015               | HP                 | HP                 | s069         | HP                     | TetA                      |
| 16 | StrB               | tnpB               | HP                 | s026               | s068         | transposase            | TetR                      |
| 17 | StrA               | StrB               | helicase           | helicase           | HP           | s013                   | helicase                  |
| 18 | Sul2               | StrA               | Mrr                | TypeII RM          | HP           | FloR                   | StrB                      |
| 19 | tnpA               | Sul2               | TraI               | TypeIII RM         | HP           | HP                     | StrA                      |
| 20 | tnp                | tnpA               | TraD               | helicase           | s065         | s015                   | Sul2                      |
| 21 | RumB               | HP                 | 234                | TraI               | SSB          | tnpB                   | tnpI                      |
| 22 | RumA               | $\beta$ -lactamase | s043               | TraD               | HP           | StrB                   | tnpII                     |
| 23 | HP                 | HP                 | HP                 | 234                | HP           | StrA                   | MutL                      |
| 24 | $\beta$ -lactamase | HP                 | TraL               | s043               | HP           | Sul2                   | RumB                      |
| 25 | HP                 | polymerase III     | TraE               | HP                 | Dns          | tnpA                   | RumA                      |
| 26 | HP                 | HP                 | TraK               | TraL               | HP           | RumB                   | polymerase III            |
| 27 | polymerase III     | s026               | TraB               | TraE               | TraN         | RumA                   | HP                        |
| 28 | HP                 | Type I RM          | TraV               | TraK               | TraU         | HP                     | s026                      |
| 29 | s026               | Type I RM          | TraA               | TraB               | TraW         | polymerase III         | Type III RM               |
| 30 | Type I RM          | bstXI              | HP                 | TraV               | TrhF         | HP                     | Type III RM               |
| 31 | Type I RM          | Type I RM          | s054               | TraA               | 345          | s026                   | HP                        |
| 32 | bstXI              | ATPase             |                    | Ynd                | TraC         | inner membrane protein | HP                        |
| 33 | Type I RM          | tnp                | 345                | Ync                | Ync          | cytoplasmic protein    | HP                        |
| 34 | ATPase             | HP                 | TrhF               | s054               | TraA         | HP                     | TraI                      |
| 35 | tnp                | McrC               | TraW               | TraC               | TraV         | HP                     | TraD                      |
| 36 | HP                 | Mrr                | TraU               | 345                | HP           | RM II System           | 234                       |
| 37 | McrC               | HP                 | TraN               | TrhF               | TraK         | s038                   | s043                      |
| 38 | Mrr                | HP                 | putative integrase | TraW               | TraE         | s039                   | HP                        |
| 39 | HP                 | TraI               | transposase        | TraU               | TraL         | ATPase                 | Transcriptional regulator |
| 40 | HP                 | TraD               | HP                 | TraN               | HP           | TraI                   | TraL                      |
| 41 | TraI               | 234                | s063               | HP                 | s043         | TraD                   | TraE                      |
| 42 | TraD               | s043               | HP                 | GTPases            | TraD         | 234                    | TraK                      |
| 43 | 234                | HP                 | SSB                | HP                 | TraI         | s043                   | TraB                      |
| 44 | s043               | TraL               | Bet                | Dns                | Type II RM   | HP                     | TraV                      |
| 45 | HP                 | TraE               | HP                 | s063               | helicase     | TraL                   | TraA                      |
| 46 | TraL               | TraK               | s066               | HP                 | HP           | TraE                   | Ynd                       |

|    |              |              |         |              |                    |                       |              |
|----|--------------|--------------|---------|--------------|--------------------|-----------------------|--------------|
| 47 | TraE         | TraB         | s067    | HP           | HP                 | TraK                  | Ync          |
| 48 | TraK         | TraV         | HP      | SSB          | polymerase III     | TraB                  | s054         |
| 49 | TraB         | TraA         | s068    | Bet          | $\beta$ -lactamase | TraV                  | TraC         |
| 50 | TraV         | Ynd          | s069    | HP           | HP                 | TraA                  | 345          |
| 51 | TraA         | Ync          | s070    | s066         | HP                 | Ynd                   | TrhF         |
| 52 | Ynd          | s054         | s071    | s067         | s002               | Ync                   | TraW         |
| 53 | Ync          | TraC         | HP      | HP           | s003               | HP                    | TraU         |
| 54 | s054         | 345          | primase | s068         | -                  | helicase              | TraN         |
| 55 | TraC         | TrhF         | s073    | s069         | -                  | HP                    | HP           |
| 56 | 345          | TraW         | HP      | s070         | -                  | HP                    | helicase     |
|    |              |              |         |              |                    | type 4 fimbriae       |              |
| 57 | TrhF         | TraU         |         | s071         |                    | expression regulatory |              |
|    |              |              | TraF    |              | -                  | protein               | Dns          |
| 58 | TraW         | TraN         | TraH    | HP           | -                  | s054                  | ISPpu12 tnpA |
| 59 | TraU         | HP           | TraG    | primase      | -                  | TraC                  | s063         |
| 60 | TraN         | helicase     | EexR    | s073         | -                  | 345                   | HP           |
| 61 | HP           | Dns          | SetC    | HP           | -                  | TrhF                  | SSB          |
| 62 | helicase     | ISPpu12 tnpA | SetD    | endonuclease | -                  | TraW                  | Bet          |
| 63 | Dns          | lspA         | s082    | prcA         | -                  | TraU                  | HP           |
| 64 | ISPpu12 tnpA | CzcD         | HP      | TraF         | -                  | TraN                  | s066         |
| 65 | lspA         | MerR         | s085    | TraH         | -                  | prcA                  | s067         |
| 66 | CzcD         | HP           | s086    | TraG         | -                  | exonuclease           | HP           |
| 67 | MerR         | HP           | SetR    | EexS         | -                  | serine protease       | s068         |
| 68 | HP           | Resolvase    | -       | SetC         | -                  | FtsH                  | s069         |
| 69 | HP           | HP           | -       | SetD         | -                  | HP                    | s070         |
| 70 | Resolvase    | HP           | -       | s082         | -                  | s063                  | s071         |
| 71 | HP           | TetA         | -       | HP           | -                  | HP                    | HP           |
| 72 | TetA         | TetR         | -       | s085         | -                  | SSB                   | primase      |
| 73 | TetR         | s063         | -       | s086         | -                  | Bet                   | s073         |
| 74 | s063         | HP           | -       | SetR         | -                  | HP                    | TraF         |
| 75 | HP           | SSB          | -       | -            | -                  | s066                  | TraH         |
| 76 | SSB          | Bet          | -       | -            | -                  | s067                  | TraG         |
| 77 | Bet          | HP           | -       | -            | -                  | HP                    | EexS         |
| 78 | HP           | s066         | -       | -            | -                  | s068                  | SetC         |
| 79 | s066         | s067         | -       | -            | -                  | s069                  | SetD         |
| 80 | s067         | HP           | -       | -            | -                  | s070                  | s082         |
| 81 | HP           | s068         | -       | -            | -                  | s071                  | HP           |
| 82 | s068         | s069         | -       | -            | -                  | HP                    | s085         |
| 83 | s069         | s070         | -       | -            | -                  | primase               | s086         |
| 84 | s070         | s071         | -       | -            | -                  | s073                  | SetR         |
| 85 | s071         | HP           | -       | -            | -                  | HP                    | -            |
| 86 | HP           | primase      | -       | -            | -                  | DhfR                  | -            |
| 87 | primase      | s073         | -       | -            | -                  | intIPac               | -            |
| 88 | s073         | TraF         | -       | -            | -                  | TraF                  | -            |

|    |      |      |   |   |   |      |   |
|----|------|------|---|---|---|------|---|
| 89 | TraF | TraH | - | - | - | TraH | - |
| 90 | TraH | TraG | - | - | - | TraG | - |
| 91 | TraG | EexS | - | - | - | EexR | - |
| 92 | EexS | SetC | - | - | - | SetC | - |
| 93 | SetC | SetD | - | - | - | SetD | - |
| 94 | SetD | s082 | - | - | - | s082 | - |
| 95 | s082 | HP   | - | - | - | HP   | - |
| 96 | HP   | s085 | - | - | - | s085 | - |
| 97 | s085 | s086 | - | - | - | s086 | - |
| 98 | s086 | SetR | - | - | - | SetR | - |
| 99 | SetR | -    | - | - | - | -    | - |

HP: Hypothetical protein

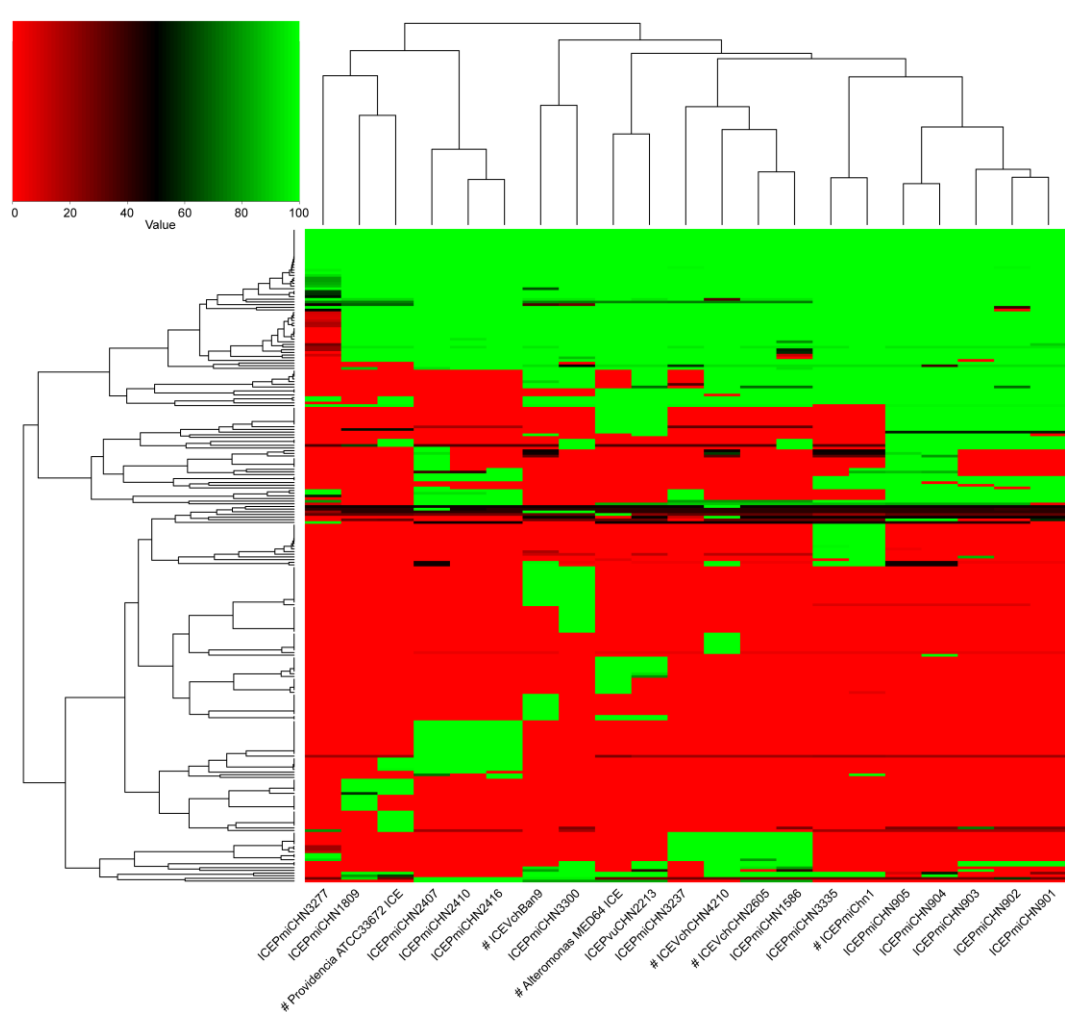

17  
 18 Supplementary Figure S1. Gene similarity heatmap of the fifteen ICEs in this study  
 19 and six reference ICEs (indicated by “#”). The row cluster represents different ICEs  
 20 and the column indicates annotated genes of each ICE (Table S1). The similarity  
 21 value for each gene was depicted by colour with the legend indicated at the upper of  
 22 the figure.
